# Supplementary material for: Rational construction of luminescent Eu-doped Y-MOF for ratiometric temperature sensing
Source: Royal Society of Chemistry journal article supplement (doi:10.1039/d4ra05796a), 2024-01-01
Supplement: d4ra05796a1.pdf [file d4ra05796a1.pdf]

***Electronic Supplementary Information (SI) for***

**Rational construction of dual-emitter luminescent Eu-doped Y-MOF for  
ratiometric temperature sensing**

Wei Wei,\* Xi Li, Yong-Ya Zhang and Jian-Wei Zhang\*

*School of Chemistry and Chemical Engineering, Shangqiu Normal University,  
Shangqiu, Henan, 476000, P. R. China.*

\*Corresponding Authors:

E-mail: weiweizzuli@163.com (W. Wei); jwzhang85@163.com (J.-W. Zhang).

## **1. Experimental section**

### **1.1 Materials and Methods.**

All chemicals used in the syntheses were purchased from commercial sources and were used as received. Powder X-ray diffraction (PXRD) pattern was collected by a Rigaku MiniFlex600 diffractometer with Cu K $\alpha$  ( $\lambda = 1.54056 \text{ \AA}$ ). The crystal image and semi-quantitative elemental analyses of samples were performed by using Thermo Fisher Verios G4 equipped and its energy dispersive spectroscopy (EDS) detector. X-ray photoelectron spectroscopy (XPS) analysis measurement was collected on a Thermo-Scientific K-Alpha Plus X-ray photoelectron spectrometer using Al K $\alpha$  source. FT-IR spectra were recorded on a Bruker Tensor 27 spectrophotometer using KBr pellets in the range of 4000–400  $\text{cm}^{-1}$ . The solid-state photoluminescence (PL) spectrum of SNNU-325 and Eu@SNNU-325 was recorded on an Edinburgh FLS1000 at room temperature. The temperature-dependent luminescent measurements of Eu@SNNU-325 were recorded an Edinburgh FLS980.

**Table S1** Fitting parameters of Eu@SNNU-325 with Boltzmann equation by using software OriginPro 8.5.

| MOF         | Thermometri<br>c<br>parameter | $A_1$    | $A_2$     | $T_0$     | $dT$     |
|-------------|-------------------------------|----------|-----------|-----------|----------|
| Eu@SNNU-325 | $I_{618}/I_{544}$             | 10.87208 | 106.74441 | 326.27981 | 35.93929 |

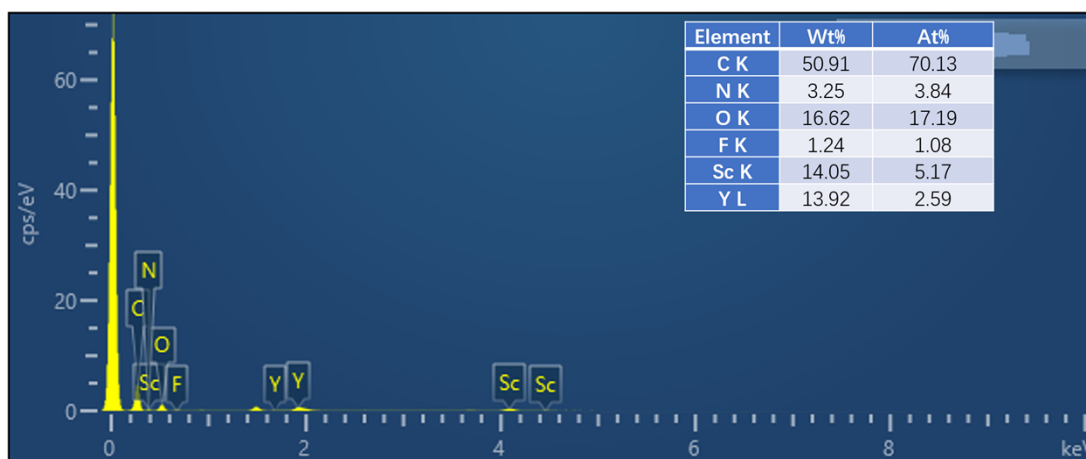

**Fig. S1** EDS analysis of as-synthesized SNNU-325.

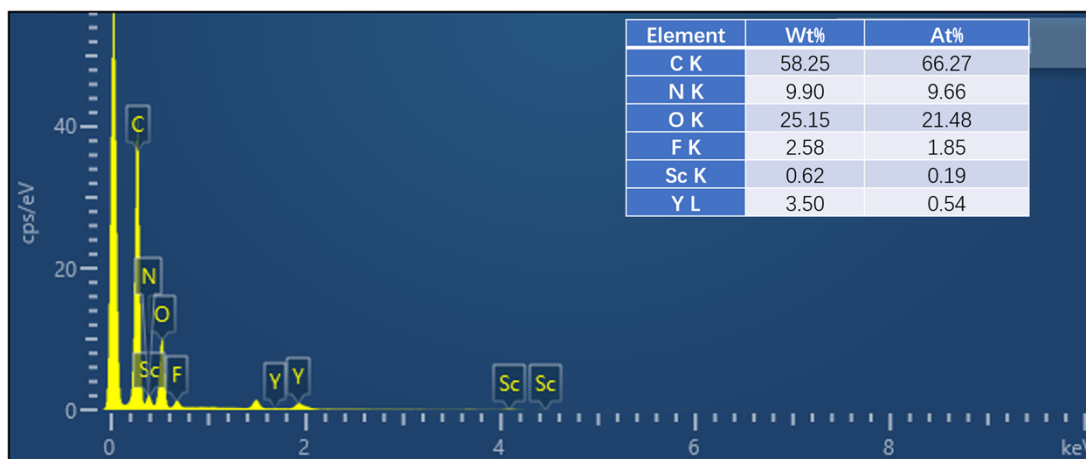

**Fig. S2** EDS analysis of SNNU-325 after immersed in MeOH for 4 days.

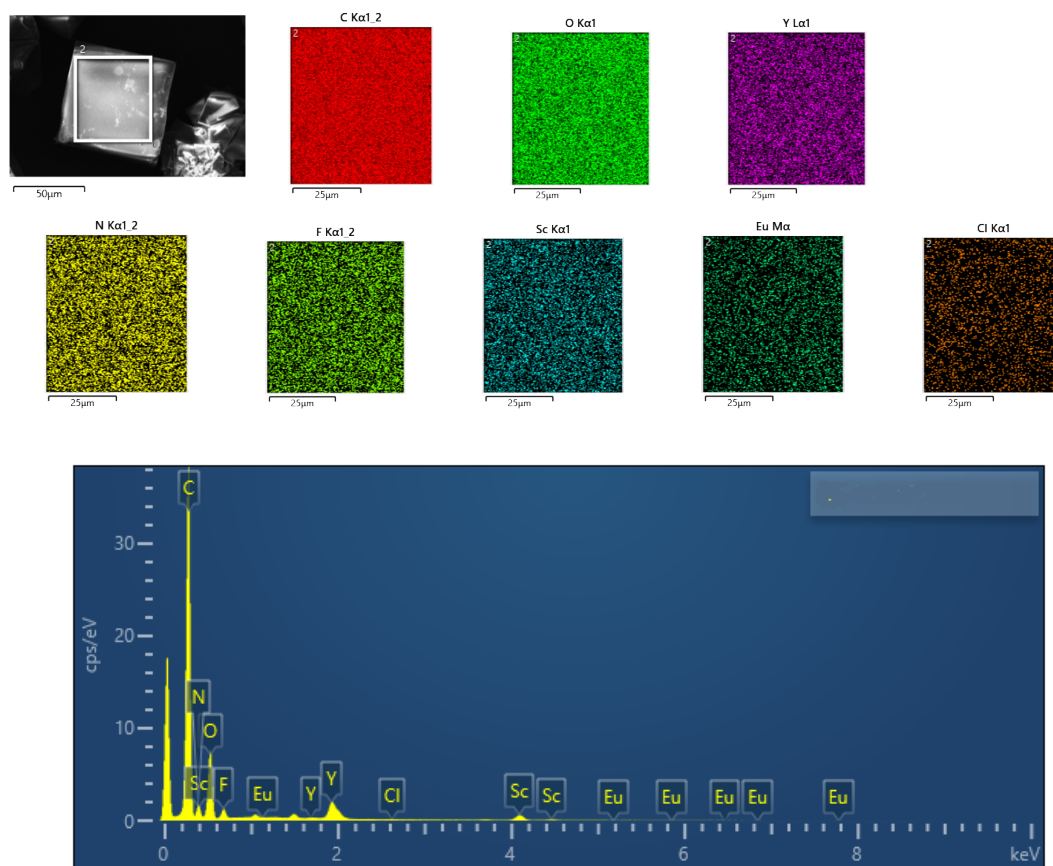

**Fig. S3** SEM elemental mapping images and EDS energy spectrum analysis of Eu@SNNU-325.
